# Supplementary material for: Comparative genomic analyses of Cutibacterium granulosum provide insights into genomic diversity
Source: Front Microbiol. 2024 Jan 17;15:1343227. doi: 10.3389/fmicb.2024.1343227 (PMC10832045; doi:10.3389/fmicb.2024.1343227)
Supplement: Supplementary file 1 [file Table_1.XLSX]

## Sheet: Table S1
Table 1. Detailed features of C. granulosum genomes
genome IDs	isolate name	genome size（Mb)	contig No.	N50 (bp)	GC content	Completeness	Contamination	protein coding genes	16s rRNA	assembly level	data source	clade specific
A11_bin.2	-	2.026	247	11625	64.3516	95.94	3.4	1799	-	MAG	this study	other
A13_bin.6	-	2.238	48	79438	64.0833	98.79	0.66	1904	-	MAG	this study	clade A
A14_bin.3	-	2.104	54	61080	64.2066	98.79	1.64	1785	-	MAG	this study	other
A15_bin.2	-	2.033	250	11050	64.3555	96.55	1.54	1772	-	MAG	this study	other
A30_bin.4	-	2.136	271	11212	64.1876	97.48	1.64	1882	-	MAG	this study	clade A
A31_bin.5	-	2.422	321	12189	64.0724	98.14	3.79	2153	-	MAG	this study	other
A42_bin.12	-	2.174	19	211086	64.1633	98.79	2.63	1809	-	MAG	this study	clade A
A49_bin.7	-	2.178	376	8354	64.2147	97.86	3.29	1949	-	MAG	this study	clade A
B01_bin.4	-	2.254	124	27185	64.1725	98.79	0.44	1931	-	MAG	this study	clade A
B10_bin.10	-	2.369	40	109204	63.8945	98.79	1.97	2025	-	MAG	this study	clade A
B11_bin.7	-	2.112	391	6936	64.3343	96.16	3.62	1936	-	MAG	this study	other
B39_bin.8	-	2.143	20	162248	64.1932	98.79	1.97	1780	-	MAG	this study	clade A
B42_bin.5	-	2.206	91	43461	64.0992	98.14	3.56	1859	-	MAG	this study	clade A
A45_bin.4	-	2.147	322	9328	64.0766	94.4	1.13	1903	-	MAG	this study	clade A
B08_bin.5	-	1.951	388	6010	64.3567	93.09	2.96	1736	-	MAG	this study	other
B17_bin.6	-	2.016	335	7852	64.199	90.9	0.77	1805	-	MAG	this study	clade A
B21_bin.8	-	2.129	509	4966	64.2126	93.48	3.95	1982	-	MAG	this study	other
B28_bin.2	-	2.026	280	9498	64.3627	90.93	4.06	1796	-	MAG	this study	other
GCA_943912955.1	-	2.205	21	197981	64.1609	99.45	0	1860	-	MAG	NCBI	other
GCA_018366805.1	-	2.129	386	8321	64.1315	96.71	2.69	1880	-	MAG	NCBI	clade B
GCA_030826365.1	-	2.09	49	63645	64.244	98.79	0	1759	-	MAG	NCBI	other
GCA_032474995.1	-	2.11	29	279039	64.3691	98.79	0	1782	-	MAG	NCBI	other
GCA_032510225.1	-	2.224	141	25464	64.0809	98.74	1.75	1902	-	MAG	NCBI	clade B
GCA_032510525.1	-	2.335	51	275948	62.7213	98.79	3.29	1964	1	MAG	NCBI	clade B
GCA_032580335.1	-	2.057	27	186316	64.2288	98.68	0	1725	-	MAG	NCBI	other
GCA_001700755.2	DSM 20700	2.165	53	95306	64.195	98.79	0	1809	2	WGS	NCBI	clade B
GCA_000463665.1	DSM 20700	2.128	372	10520	64.1104	98.14	2.52	1880	1	WGS	NCBI	clade B
GCA_000464495.1	TM11	2.14	98	53576	64.1617	98.46	0	1797	1	WGS	NCBI	clade B
GCA_030295285.1	TP-CG7	2.179	2	2148765	64.1596	99.01	0.99	1838	2	Complete	NCBI	other
GCA_900186975.1	NCTC11865	2.175	1	2175244	64.1904	98.79	0	1806	2	Complete	NCBI	clade B
